# Supplementary material for: Improvements in printable mesoscopic perovskite solar cells via thinner spacer layers
Source: Royal Society of Chemistry journal article supplement (doi:10.1039/c8se00332g), 2018-01-01
Supplement: c8se00332g1.pdf [file c8se00332g1.pdf]

## Supporting Information

### Improvement in printable mesoscopic perovskite solar cells via thinner spacer layer

Qifei Wang<sup>a</sup>, Shuang Liu<sup>a</sup>, Yue Ming<sup>a</sup>, Yanjun Guan<sup>a</sup>, Daiyu Li<sup>a</sup>, Congcong Zhang<sup>b</sup>, Zhaokui Wang<sup>b</sup>, Yaoguang Rong<sup>a</sup>, Yue Hu<sup>a\*</sup>, Hongwei Han<sup>a\*</sup>

a. Michael Grätzel Center for Mesoscopic Solar Cells, Wuhan National Laboratory for Optoelectronics, Huazhong University of Science and Technology, Wuhan 430074, Hubei, P. R. China. b. Jiangsu Key Laboratory for Carbon-Based Functional Materials and Devices, Institute of Functional Nano and Soft Materials (FUNSOM), Soochow University, Suzhou 215123, China

\*Correspondence to e-mail: [yuehu@hust.edu.cn](mailto:yuehu@hust.edu.cn), [hongwei.han@mail.hust.edu.cn](mailto:hongwei.han@mail.hust.edu.cn)

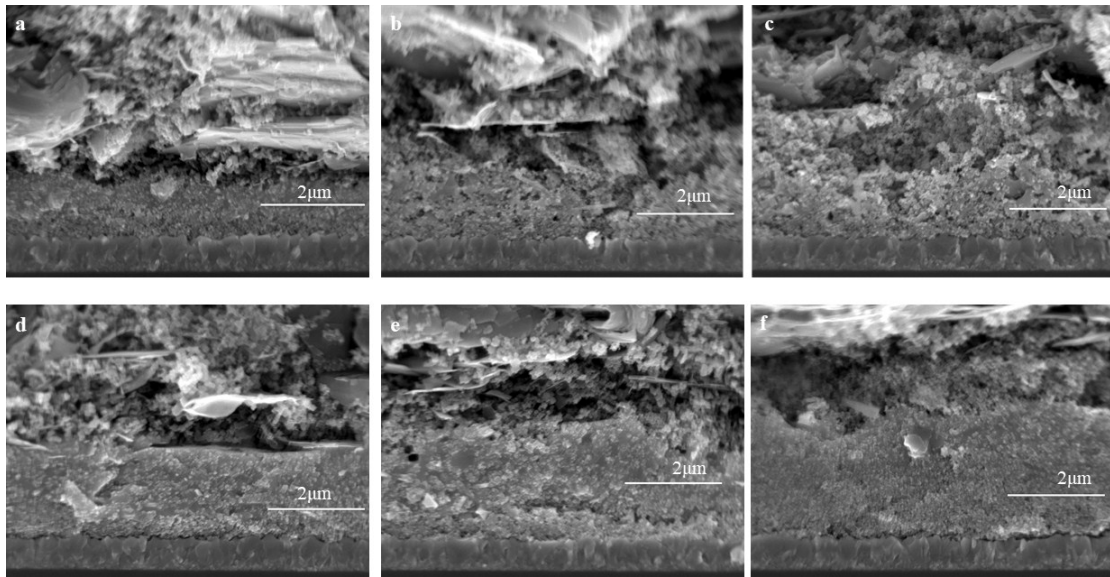

**Figure S1.** The cross-section SEM of devices with different thickness of mp-ZrO<sub>2</sub> layer. 2 µl (a,b,c) and 3 µl (d,e,f) of perovskite precursor solution were filled into devices with 1.2 µm (a,d), 2 µm (b,e) and 3 µm (c,f) mp-ZrO<sub>2</sub> layers.

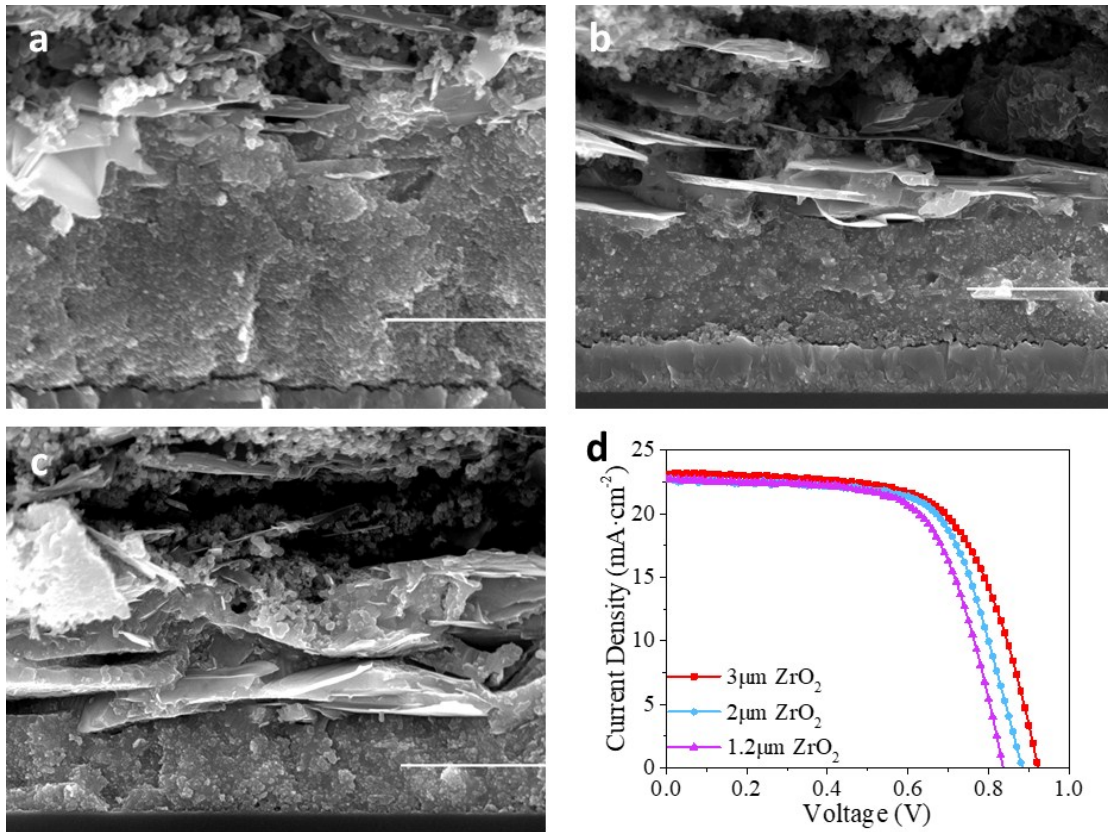

**Figure S2. Cross-section SEM images and performance of devices.** The thickness of ZrO<sub>2</sub> layer in devices are 3 μm (a), 2 μm (b), and 1.2 μm (c). (d) The J-V curve of three types of devices with three different ZrO<sub>2</sub>.

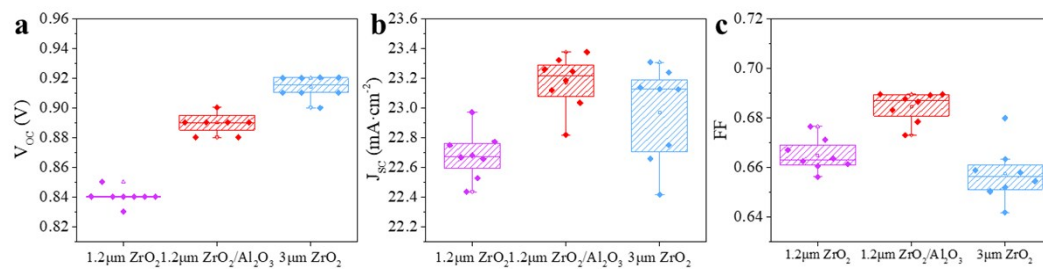

**Figure S3. The parameters of devices based on different thickness of  $ZrO_2$ .** (a)  $V_{OC}$ , (b)  $J_{SC}$ , (c) FF. For each kind of devices, eight devices are tested and all devices are fabricated in the same batch.

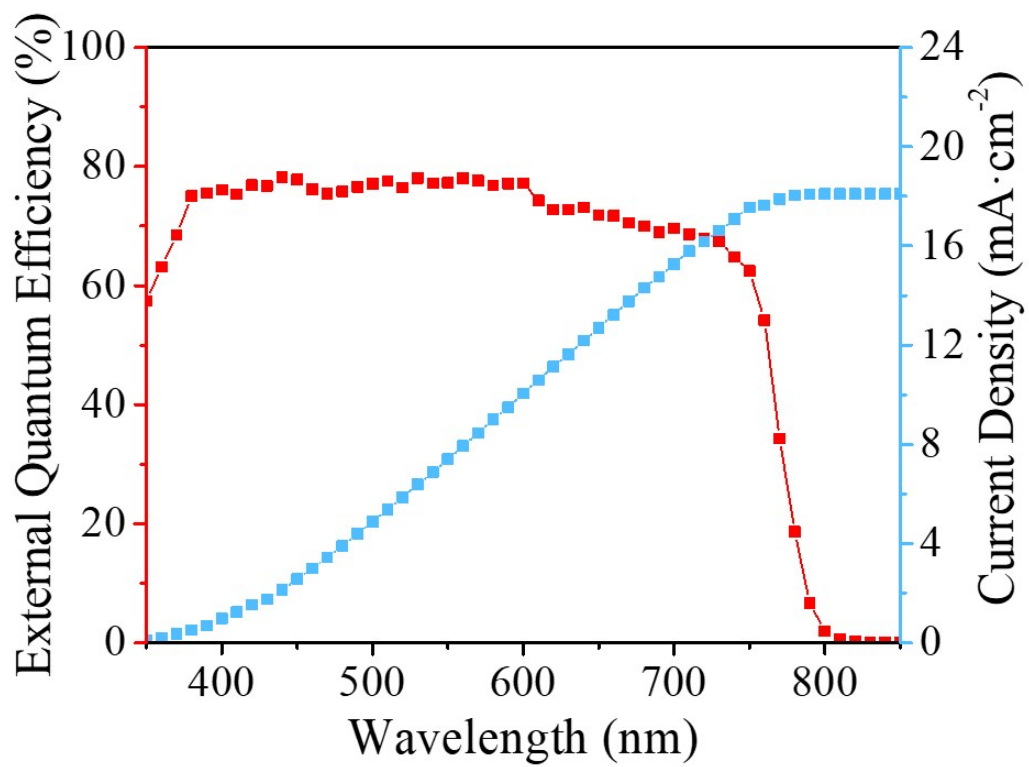

**Figure S4.** The IPCE spectrum and integrated photocurrent of the champion device.

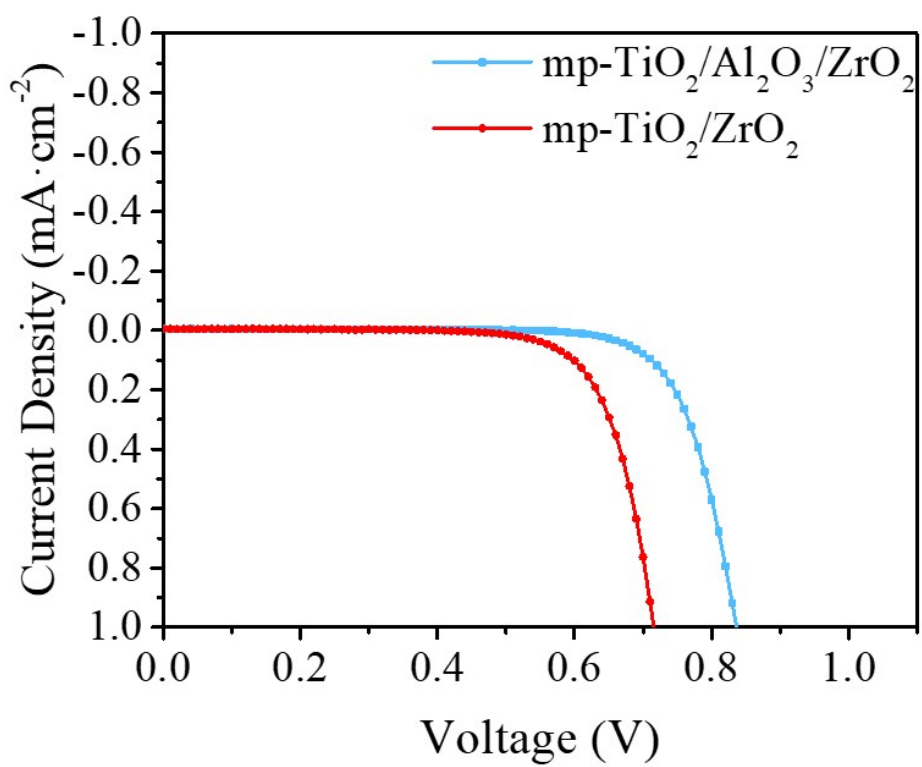

**Figure S5.** The dark current density of devices, the sweep rate was 100mV·s<sup>-1</sup>

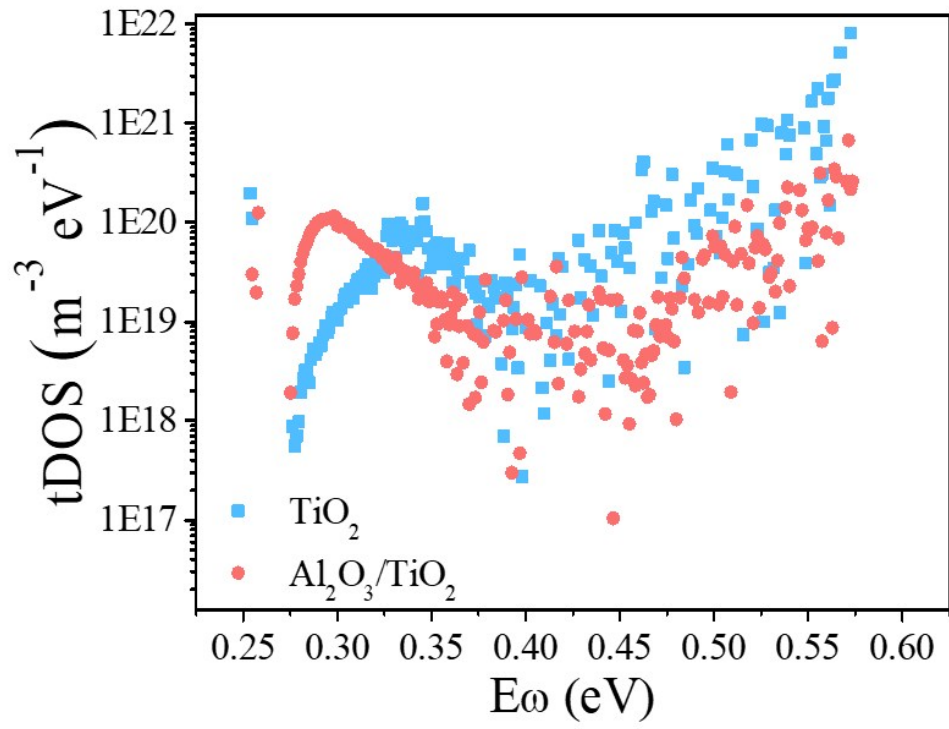

**Figure S6.** The result of TAS test of mp- $TiO_2$  and mp- $TiO_2/Al_2O_3$  films.

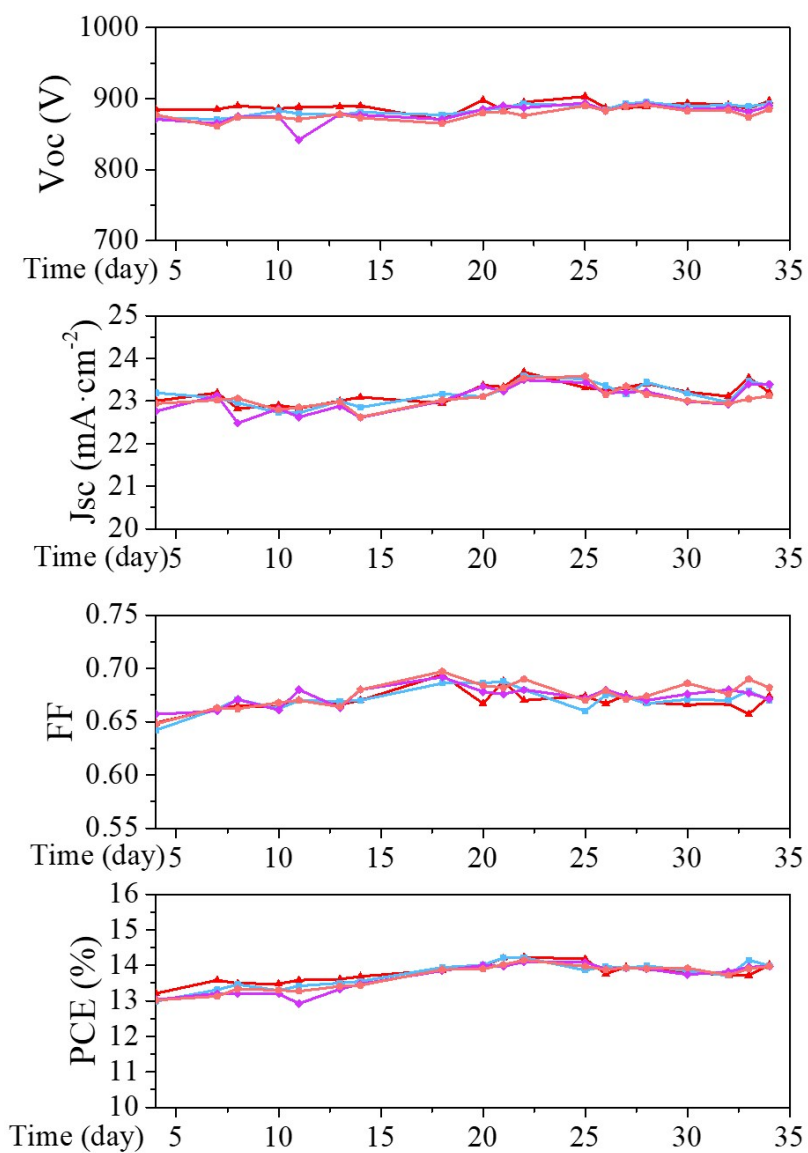

**Figure S7. The stability of devices.** (a)  $V_{oc}$ , (b)  $J_{sc}$ , (c) FF, (d) PCE of four devices within a period of time. The devices were stored in the humidity chamber without encapsulation. (RH~60%, Temperature~25 °C)



| Peak  | Position<br>BE(eV) | FWHM<br>(eV) | Raw Area<br>(cps eV) | RSF   | Atomic<br>Mass | Atomic<br>Conc % | Mass<br>Conc % |
|-------|--------------------|--------------|----------------------|-------|----------------|------------------|----------------|
| Ti 2p | 458.678            | 1.043        | 74324.6              | 2.001 | 47.878         | 39.71            | 72.29          |
| C 1s  | 285.078            | 1.315        | 14869.5              | 0.278 | 12.011         | 59.97            | 27.39          |
| Al 2p | 73.828             | 0.317        | 50.0                 | 0.193 | 26.982         | 0.31             | 0.32           |

**Table S1.** The XPS result of the mp-TiO<sub>2</sub>/Al<sub>2</sub>O<sub>3</sub> film deposited on the FTO substrate.
